# Supplementary material for: Human Amniotic Fluid Mesenchymal Stem Cells from Second- and Third-Trimester Amniocentesis: Differentiation Potential, Molecular Signature, and Proteome Analysis
Source: Hindawi journal article supplement (doi:10.1155/2015/319238), 2015-01-01
Supplement: f1 [file 319238.f1.pdf]

SUPPLEMENT

TABLE 1: Proteins expressed in AF-MSCs and identified by SYNAPT G2 HD Mass Spectrometer. Proteins with the expression ratio above 1.5 in comparison with undifferentiated control were selected.

A mean fold change in the expression of proteins is presented as the median of Myo/C, Adipo/C, Osteo/C, Neuro/C ratios calculated between myogenically (Myo), adipogenically (Adipo), osteogenically (Osteo) and neurogenically (Neuro) differentiated and undifferentiated (C) cells. A positive (+) protein expression is defined vs. negative (-) expression in undifferentiated cells. Statistically significant differences of protein expression levels were determined using Student's t-test and presented in the table as P (Myo/C, Adipo/C, Osteo/C, Neuro/C) where  $\geq 95$  (up-regulation) arba  $\leq -95$  (down-regulation).

| Nr. | Supplemental Table Description                                            | Entry       | Accession number | pI    | MW    | Max score | Reported peptides | Sequence coverage, % | Ratio Myo/C | Ratio Adipo/C | Ratio Osteo/C | Ratio Neuro/C | P Myo/C | P Adipo/C | P Osteo/C | P Neuro/C |
|-----|---------------------------------------------------------------------------|-------------|------------------|-------|-------|-----------|-------------------|----------------------|-------------|---------------|---------------|---------------|---------|-----------|-----------|-----------|
| 1   | Latexin OS Homo sapiens GN LXN PE 1 SV 2                                  | LXN_HUMAN   | Q9BS40           | 5.42  | 25864 | 10966.13  | 2                 | 12.16                | +           | +             | +             | +             | 88.36   | 100.00    | 99.98     | 100.00    |
| 2   | Growth differentiation factor 6 OS Homo sapiens GN GDF6 PE 1 SV 1         | GDF6_HUMAN  | Q6KF10           | 9.01  | 51175 | 806.42    | 2                 | 12.31                | +           | +             | +             | +             | 92.05   | 100.00    | 62.61     | 99.99     |
| 3   | Ig mu heavy chain disease protein OS Homo sapiens PE 1 SV 1               | MUCB_HUMAN  | P04220           | 4.95  | 43571 | 779.9     | 3                 | 7.67                 | +           | +             | +             | +             | 87.92   | 88.14     | 94.50     | 99.46     |
| 4   | Alpha crystallin B chain OS Homo sapiens GN CRYAB PE 1 SV 2               | CRYAB_HUMAN | P02511           | 6.92  | 20159 | 3540.02   | 3                 | 16.57                | +           | +             | +             | -             | 88.31   | 62.61     | 100.00    | 0.00      |
| 5   | Glycogen synthase kinase 3 beta OS Homo sapiens GN GSK3B PE 1 SV 2        | GSK3B_HUMAN | P49841           | 8.89  | 47258 | 1194.15   | 2                 | 5.24                 | +           | +             | +             | -             | 98.97   | 99.84     | 100.00    | 0.00      |
| 6   | ATP dependent RNA helicase DDX19A OS Homo sapiens GN DDX19A PE 1 SV 1     | DD19A_HUMAN | Q9NUU7           | 6.16  | 54431 | 976.25    | 3                 | 6.49                 | -           | +             | +             | +             | 0.00    | 87.87     | 62.61     | 62.61     |
| 7   | Selenium binding protein 1 OS Homo sapiens GN SELENBP1 PE 1 SV 2          | SBP1_HUMAN  | Q13228           | 5.91  | 52961 | 693.53    | 2                 | 6.36                 | -           | -             | -             | +             | 0.00    | 0.00      | 0.00      | 82.65     |
| 8   | Ras related protein Rab 15 OS Homo sapiens GN RAB15 PE 1 SV 1             | RAB15_HUMAN | P59190           | 5.39  | 24676 | 10042.39  | 3                 | 2.83                 | -           | <b>-1.3</b>   | <b>-1.1</b>   | -             | -85.27  | 21.25     | -11.39    | -100.00   |
| 9   | Serine arginine rich splicing factor 2 OS Homo sapiens GN SRSF2 PE 1 SV 4 | SRSF2_HUMAN | Q01130           | 12.26 | 25476 | 5398.974  | 3                 | 9.05                 | -           | <b>-1</b>     | -             | -             | -99.21  | -85.06    | -99.21    | -98.08    |

|    |                                                                                                |             |        |       |        |          |    |       |   |      |      |       |        |        |        |         |
|----|------------------------------------------------------------------------------------------------|-------------|--------|-------|--------|----------|----|-------|---|------|------|-------|--------|--------|--------|---------|
| 10 | Ras related protein Rab 12 OS Homo sapiens GN RAB12 PE 1 SV 3                                  | RAB12_HUMAN | Q6IQ22 | 8.51  | 27591  | 5113.237 | 3  | 7.38  | - | -    | -1.5 | -     | -87.23 | -87.23 | -61.45 | -88.39  |
| 11 | Actin related protein 2 3 complex subunit 5 OS Homo sapiens GN ARPC5 PE 1 SV 3                 | ARPC5_HUMAN | O15511 | 5.31  | 16377  | 4083.225 | 3  | 12.58 | - | -11  | -    | -13.7 | -68.02 | -66.04 | -68.02 | -98.22  |
| 12 | Seprase OS Homo sapiens GN FAP PE 1 SV 5                                                       | SEPR_HUMAN  | Q12884 | 6.2   | 88397  | 3632.45  | 18 | 3.68  | + | -    | +    | 6.6   | 88.30  | 0.00   | 99.99  | 99.99   |
| 13 | Secreted frizzled related protein 1 OS Homo sapiens GN SFRP1 PE 1 SV 1                         | SFRP1_HUMAN | Q8N474 | 8.97  | 36298  | 2288.906 | 5  | 6.05  | - | -    | -    | 2.1   | -85.50 | -85.50 | -85.50 | 99.91   |
| 14 | Vitamin D binding protein OS Homo sapiens GN VTDB_HUMAN GC PE 1 SV 1                           | VTDB_HUMAN  | P02774 | 5.24  | 54560  | 1715.75  | 5  | 9.28  | - | -2.9 | -2.4 | -     | -99.99 | -99.91 | -99.81 | -100.00 |
| 15 | Glycogenin 1 OS Homo sapiens GN GYG1 PE 1 SV 4                                                 | GLYG_HUMAN  | P46976 | 5.13  | 39726  | 1578.978 | 6  | 13.43 | + | +    | +    | 1.4   | 100.00 | 99.93  | 99.95  | 88.70   |
| 16 | Neutral amino acid transporter B 0 OS Homo sapiens GN SLC1A5 PE 1 SV 2                         | AAAT_HUMAN  | Q15758 | 5.18  | 57055  | 1560.55  | 4  | 10.54 | + | +    | +    | 2     | 100.00 | 88.06  | 99.95  | 99.85   |
| 17 | Endoglin OS Homo sapiens GN ENG PE 1 SV 2                                                      | EGLN_HUMAN  | P17813 | 6.14  | 71605  | 1173.463 | 6  | 7.14  | - | -    | +    | 3.7   | 0.00   | 0.00   | 62.61  | 99.98   |
| 18 | Deoxyuridine 5 triphosphate nucleotidohydrolase mitochondrial OS Homo sapiens GN DUT PE 1 SV 4 | DUT_HUMAN   | P33316 | 9.64  | 26848  | 1120.79  | 3  | 11.51 | - | 1.2  | 1.2  | -     | -62.61 | 86.99  | 90.62  | -99.99  |
| 19 | Uridine cytidine kinase 2 OS Homo sapiens GN UCK2 PE 1 SV 1                                    | UCK2_HUMAN  | Q9BZX2 | 6.25  | 29470  | 1075.959 | 2  | 9.58  | - | -    | -3   | -     | -62.61 | -62.61 | -23.44 | -62.61  |
| 20 | Integrin alpha 8 OS Homo sapiens GN ITGA8 PE 1 SV 3                                            | ITA8_HUMAN  | P53708 | 5.23  | 118728 | 1065.286 | 3  | 5.08  | - | -    | -    | 7.2   | 0.00   | 0.00   | 0.00   | 99.63   |
| 21 | Septin 14 OS Homo sapiens GN SEPT14 PE 1 SV 2                                                  | SEP14_HUMAN | Q6ZU15 | 5.81  | 50481  | 1027.321 | 2  | 3.7   | + | +    | +    | -1.9  | 98.45  | 87.29  | 67.95  | -73.68  |
| 22 | Cyclin dependent kinase 1 OS Homo sapiens GN CDK1 PE 1 SV 3                                    | CDK1_HUMAN  | P06493 | 8.76  | 34153  | 1024.765 | 2  | 2.69  | + | +    | +    | -     | 99.94  | 87.79  | 88.29  | -72.59  |
| 23 | Tricarboxylate transport protein mitochondrial OS Homo sapiens GN SLC25A1 PE 1 SV 2            | TXTP_HUMAN  | P53007 | 10.22 | 34355  | 935.4251 | 2  | 15.11 | + | +    | +    | 3.6   | 99.99  | 100.00 | 100.00 | 99.82   |

|    |                                                                                                |               |        |       |       |          |    |       |      |      |      |      |        |        |        |        |
|----|------------------------------------------------------------------------------------------------|---------------|--------|-------|-------|----------|----|-------|------|------|------|------|--------|--------|--------|--------|
| 24 | Lysophosphatidic acid receptor 1 OS Homo sapiens GN LPAR1 PE 1 SV 3                            | LPAR1_HUMAN   | Q92633 | 8.49  | 41737 | 934.343  | 3  | 15.66 | -    | -    | +    | 3.5  | 0.00   | 0.00   | 87.90  | 99.91  |
| 25 | Kinesin light chain 1 OS Homo sapiens GN KLC1 PE 1 SV 2                                        | KLC1_HUMAN    | Q07866 | 5.8   | 65823 | 909.7861 | 2  | 4.54  | -    | -1.8 | -1.1 | -1.5 | -99.95 | -97.31 | -71.07 | -95.03 |
| 26 | Interferon induced protein with tetratricopeptide repeats 3 OS Homo sapiens GN IFIT3 PE 1 SV 1 | IFIT3_HUMAN   | O14879 | 4.95  | 56726 | 900.6319 | 3  | 10    | +    | -    | +    | 4.5  | 88.00  | 0.00   | 100.00 | 99.92  |
| 27 | Caspase 1 OS Homo sapiens GN CASP1 PE 1 SV 1                                                   | CASP1_HUMAN   | P29466 | 5.53  | 45843 | 851.947  | 4  | 11.14 | +    | -    | +    | 2.8  | 100.00 | 0.00   | 86.83  | 100.00 |
| 28 | Metalloproteinase inhibitor 3 OS Homo sapiens GN TIMP3 PE 1 SV 2                               | TIMP3_HUMAN   | P35625 | 8.76  | 24829 | 810.8984 | 2  | 10.9  | -    | -    | -    | 1    | 0.00   | 0.00   | 0.00   | 11.51  |
| 29 | Integrator complex subunit 4 like protein 2 OS Homo sapiens GN INTS4L2 PE 2 SV 1               | INTS4L2_HUMAN | Q2T9F4 | 5.77  | 49568 | 792.9083 | 4  | 10.02 | -    | -    | -1.1 | +    | -85.25 | -85.25 | -53.27 | 62.61  |
| 30 | Transmembrane glycoprotein NMB OS Homo sapiens GN GPNMB PE 1 SV 2                              | GPNMB_HUMAN   | Q14956 | 6.17  | 64664 | 1467.107 | 4  | 6.12  | 11.7 | -    | 14.8 | 13.7 | 99.69  | -87.47 | 99.97  | 99.53  |
| 35 | Protein Wnt 5a OS Homo sapiens GN WNT5A PE 1 SV 2                                              | WNT5A_HUMAN   | P41221 | 8.37  | 43708 | 7620.229 | 12 | 2.89  | 4    | -    | -    | 6.5  | 49.68  | -62.61 | -62.61 | 100.00 |
| 36 | Protein S100 A4 OS Homo sapiens GN S100A4 PE 1 SV 1                                            | S100A4_HUMAN  | P26447 | 5.77  | 11957 | 11353.28 | 6  | 33.66 | 2.8  | -    | 12.9 | 2.2  | 99.09  | -62.61 | 99.98  | 99.96  |
| 37 | Glutathione S transferase theta 1 OS Homo sapiens GN GSTT1 PE 1 SV 4                           | GSTT1_HUMAN   | P30711 | 7.32  | 27506 | 965.9648 | 2  | 14.58 | 2.6  | 1.9  | -    | 3.6  | 41.06  | 98.95  | -62.61 | 99.94  |
| 38 | Cellular retinoic acid binding protein 2 OS Homo sapiens GN CRABP2 PE 1 SV 2                   | RABP2_HUMAN   | P29373 | 5.18  | 15864 | 39530.23 | 9  | 15.22 | 2.4  | -1.1 | -    | 20.1 | 78.86  | -6.54  | -62.61 | 99.98  |
| 39 | Serine arginine rich splicing factor 7 OS Homo sapiens GN SRSF7 PE 1 SV 1                      | SRSF7_HUMAN   | Q16629 | 12.22 | 27595 | 1281.824 | 3  | 12.61 | 1.2  | 2    | -    | -1.5 | 88.04  | 97.31  | -99.99 | -94.01 |
| 40 | Serine arginine rich splicing factor 3 OS Homo sapiens GN SRSF3 PE 1 SV 1                      | SRSF3_HUMAN   | P84103 | 12.04 | 19558 | 1433.102 | 2  | 12.8  | 1.1  | 1.9  | -    | -1.3 | 36.40  | 95.11  | -99.14 | -60.36 |

|    |                                                                                         |             |        |       |        |          |    |       |      |      |      |      |        |         |        |        |
|----|-----------------------------------------------------------------------------------------|-------------|--------|-------|--------|----------|----|-------|------|------|------|------|--------|---------|--------|--------|
| 41 | Serine arginine rich splicing factor 6 OS Homo sapiens GN SRSF6 PE 1 SV 2               | SRSF6_HUMAN | Q13247 | 11.82 | 39701  | 878.3026 | 2  | 4.65  | -1   | 5.2  | -    | -2.1 | -7.53  | 99.94   | -99.95 | -89.00 |
| 42 | Hemopexin OS Homo sapiens GN HPX PE 1 SV 2                                              | HEMO_HUMAN  | P02790 | 6.57  | 52418  | 7467.361 | 8  | 18.83 | -1.3 | -    | -    | 19   | -93.55 | -99.98  | -99.98 | 100.00 |
| 43 | Erlin 1 OS Homo sapiens GN ERLIN1 PE 1 SV 1                                             | ERLN1_HUMAN | O75477 | 7.94  | 39097  | 911.3351 | 2  | 6.07  | -1.5 | 1.1  | -    | -3.8 | -35.65 | -42.96  | -85.04 | -99.77 |
| 44 | High mobility group protein HMGI C OS Homo sapiens GN HMGA2 PE 1 SV 1                   | HMGA2_HUMAN | P52926 | 11.11 | 11832  | 7399.867 | 2  | 21.1  | -1.5 | 1.1  | -    | 1    | -79.60 | 25.48   | -99.48 | 10.78  |
| 45 | Vasorin OS Homo sapiens GN VASN PE 1 SV 1                                               | VASN_HUMAN  | Q6EMK4 | 7.09  | 72796  | 2650.962 | 5  | 10.25 | -1.6 | -    | -1.2 | 5.8  | 57.07  | -62.61  | -9.73  | 99.96  |
| 46 | Collagen alpha 2 I chain OS Homo sapiens GN COL1A2 PE 1 SV 7                            | CO1A2_HUMAN | P08123 | 9.22  | 129827 | 7426.908 | 22 | 2.78  | -1.7 | -    | -1.2 | 4.7  | -70.05 | -86.79  | 26.18  | 100.00 |
| 47 | Growth differentiation factor 15 OS Homo sapiens GN GDF15 PE 1 SV 3                     | GDF15_HUMAN | Q99988 | 9.94  | 34654  | 1143.604 | 2  | 14.29 | -1.9 | -    | -1.9 | +    | -99.68 | -100.00 | -99.97 | 100.00 |
| 48 | Erlin 2 OS Homo sapiens GN ERLIN2 PE 1 SV 1                                             | ERLN2_HUMAN | O94905 | 5.32  | 38068  | 871.1386 | 2  | 2.95  | -2.4 | -1.5 | -    | 1.4  | -65.00 | -67.34  | -87.73 | 98.83  |
| 49 | CD109 antigen OS Homo sapiens GN CD109 PE 1 SV 2                                        | CD109_HUMAN | Q6YHK3 | 5.48  | 162602 | 1050.886 | 12 | 1.66  | -3.1 | -    | -2   | 2.2  | -99.85 | -100.00 | -99.91 | 99.99  |
| 50 | Collagen alpha 1 III chain OS Homo sapiens GN COL3A1 PE 1 SV 4                          | CO3A1_HUMAN | P02461 | 6.17  | 139819 | 1612.716 | 11 | 1.91  | -3.5 | -    | -2.7 | +    | -30.94 | -62.61  | 5.05   | 99.99  |
| 51 | Protein phosphatase 1G OS Homo sapiens GN PPM1G PE 1 SV 1                               | PPM1G_HUMAN | O15355 | 4.07  | 59956  | 981.1996 | 4  | 8.42  | -1.1 | 1.5  | -    | -1.7 | -41.42 | 98.13   | -99.92 | -98.96 |
| 52 | Prothymosin alpha OS Homo sapiens GN PTMA PE 1 SV 2                                     | PTMA_HUMAN  | P06454 | 3.45  | 12203  | 17937.57 | 3  | 12.61 | 1.7  | 3.4  | -    | 1.1  | 97.33  | 99.91   | -99.91 | 38.96  |
| 53 | Tropomodulin 2 OS Homo sapiens GN TMOD2 PE 1 SV 1                                       | TMOD2_HUMAN | Q9NZR1 | 5.03  | 39595  | 996.0465 | 2  | 9.97  | 10   | 2.6  | 6.8  | +    | 100.00 | 18.55   | 99.42  | 99.39  |
| 54 | Nicotinate nucleotide pyrophosphorylase carboxylating OS Homo sapiens GN QPRT PE 1 SV 3 | NADC_HUMAN  | Q15274 | 5.77  | 31188  | 7569.113 | 6  | 9.43  | 3.4  | -4   | 3.3  | +    | 99.99  | -99.73  | 99.95  | 100.00 |
| 55 | Heat shock related 70 kDa protein 2 OS Homo sapiens GN HSPA2 PE 1 SV 1                  | HSP72_HUMAN | P54652 | 5.41  | 70306  | 21262.09 | 18 | 5.79  | 9.2  | 18.8 | 12.4 | 2.8  | 100.00 | 100.00  | 100.00 | 99.99  |

|    |                                                                                                     |             |        |      |        |          |    |       |     |        |      |     |  |        |         |         |         |
|----|-----------------------------------------------------------------------------------------------------|-------------|--------|------|--------|----------|----|-------|-----|--------|------|-----|--|--------|---------|---------|---------|
| 56 | ADP ATP translocase 2 OS Homo sapiens GN SLC25A5 PE 1 SV 7                                          | ADT2_HUMAN  | P05141 | 9.99 | 33080  | 8690.069 | 22 | 11.74 | 3.4 | 3.1    | 3.5  | 1.6 |  | 100.00 | 100.00  | 100.00  | 99.87   |
| 57 | Dipeptidyl peptidase 4 OS Homo sapiens GN DPP4 PE 1 SV 2                                            | DPP4_HUMAN  | P27487 | 5.61 | 88963  | 3949.329 | 25 | 4.7   | 3.3 | 1.7    | 5.6  | +   |  | 100.00 | 98.90   | 99.99   | 99.95   |
| 58 | GTP AMP phosphotransferase AK4 mitochondrial OS Homo sapiens GN AK4 PE 1 SV 1                       | KAD4_HUMAN  | P27144 | 8.69 | 25382  | 2702.29  | 5  | 4.93  | 3   | 6.2    | 2.1  | +   |  | 99.95  | 100.00  | 99.90   | 0.00    |
| 59 | Calponin 1 OS Homo sapiens GN CNN1 PE 1 SV 2                                                        | CNN1_HUMAN  | P51911 | 9.38 | 33342  | 10285    | 12 | 24.58 | 2.8 | -1.6   | -1.3 | -   |  | 100.00 | -99.77  | -99.68  | -82.80  |
| 60 | EGF like repeat and discoidin I like domain containing protein 3 OS Homo sapiens GN EDIL3 PE 1 SV 1 | EDIL3_HUMAN | O43854 | 6.99 | 55134  | 14036.29 | 26 | 7.92  | 2.4 | -3.1   | 1.9  | -   |  | 100.00 | -99.99  | 100.00  | -100.00 |
| 61 | Aldo keto reductase family 1 member B15 OS Homo sapiens GN AKR1B15 PE 2 SV 1                        | AK1BF_HUMAN | C9JRZ8 | 6.01 | 39631  | 1700.866 | 2  | 6.4   | 1.9 | -108.6 | -62  | +   |  | 99.98  | -100.00 | -100.00 | 91.91   |
| 62 | Intercellular adhesion molecule 1 OS Homo sapiens GN ICAM1 PE 1 SV 2                                | ICAM1_HUMAN | P05362 | 7.92 | 58624  | 6172.111 | 18 | 16.73 | 1.8 | -2.8   | 3.5  | +   |  | 97.76  | -99.01  | 99.99   | 100.00  |
| 63 | Retinol dehydrogenase 11 OS Homo sapiens GN RDH11 PE 1 SV 2                                         | RDH11_HUMAN | Q8TC12 | 9    | 35785  | 1810.5   | 4  | 10.69 | 1.7 | 2.2    | 1.2  | +   |  | 99.93  | 99.98   | 93.87   | 100.00  |
| 64 | Coiled coil domain containing protein 57 OS Homo sapiens GN CCD57 PE 2 SV 2                         | CCD57_HUMAN | Q2TAC2 | 6.11 | 103452 | 1614.055 | 6  | 12.01 | 1.7 | 1.4    | 1.5  | -   |  | 87.38  | 79.40   | 88.20   | -100.00 |
| 65 | Serine beta lactamase like protein LACTB mitochondrial OS Homo sapiens GN LACTB PE 1 SV 2           | LACTB_HUMAN | P83111 | 8.64 | 61150  | 1331.331 | 4  | 6.58  | 1.7 | -1     | 1.2  | +   |  | 99.73  | -11.97  | 65.32   | 72.60   |
| 66 | Connective tissue growth factor OS Homo sapiens GN CTGF PE 1 SV 2                                   | CTGF_HUMAN  | P29279 | 7.86 | 40316  | 1452.084 | 4  | 14.04 | 1.7 | 1.2    | 1.4  | +   |  | 98.64  | 85.79   | 96.63   | 87.68   |
| 67 | FAS associated factor 2 OS Homo sapiens GN FAF2 PE 1 SV 2                                           | FAF2_HUMAN  | Q96CS3 | 5.31 | 52966  | 880.4904 | 2  | 9.89  | 1.4 | 1.7    | 1.3  | +   |  | 86.46  | 99.83   | 91.64   | 99.97   |
| 68 | Mammalian ependymin related protein 1 OS Homo sapiens GN EPDR1 PE 1 SV 2                            | EPDR1_HUMAN | Q9UM22 | 6.42 | 25893  | 3062.685 | 4  | 14.29 | 1.3 | 2.3    | 1.8  | -   |  | 98.74  | 99.50   | 99.57   | -62.61  |

|    |                                                                                           |             |        |      |       |          |    |       |      |      |      |      |        |        |        |        |
|----|-------------------------------------------------------------------------------------------|-------------|--------|------|-------|----------|----|-------|------|------|------|------|--------|--------|--------|--------|
| 69 | OCIA domain containing protein 2 OS Homo sapiens GN OCIAD2 PE 1 SV 1                      | OCAD2_HUMAN | Q56VL3 | 9.32 | 17296 | 5825.607 | 5  | 18.83 | 1.3  | -7.2 | -1.3 | +    | 98.11  | -99.99 | -96.81 | 62.61  |
| 70 | Tubulointerstitial nephritis antigen like OS Homo sapiens GN TINAGL1 PE 1 SV 1            | TINAL_HUMAN | Q9GZM7 | 6.54 | 53756 | 698.4343 | 4  | 10.06 | 1.2  | -1.1 | 3.9  | -    | 98.65  | -74.06 | 99.29  | 0.00   |
| 71 | Cell surface glycoprotein MUC18 OS Homo sapiens GN MCAM PE 1 SV 2                         | MUC18_HUMAN | P43121 | 5.46 | 72577 | 1813.984 | 11 | 11.76 | 1.2  | -2.1 | 2.1  | -    | 57.80  | -99.55 | 99.97  | 0.00   |
| 72 | Creatine kinase B type OS Homo sapiens GN CKB PE 1 SV 1                                   | KCRB_HUMAN  | P12277 | 5.22 | 42930 | 5774.735 | 7  | 7.35  | 1.1  | 8.6  | 1.6  | -    | 74.43  | 100.00 | 99.67  | -99.95 |
| 73 | Ras related protein Rab 4B OS Homo sapiens GN RAB4B PE 1 SV 1                             | RAB4B_HUMAN | P61018 | 5.7  | 23872 | 7937.194 | 3  | 17.37 | -1.1 | 1.1  | 2    | -    | -27.75 | 36.26  | 96.25  | -99.99 |
| 74 | Tumor associated calcium signal transducer 2 OS Homo sapiens GN TACSTD2 PE 1 SV 3         | TACD2_HUMAN | P09758 | 8.96 | 36394 | 1362.2   | 2  | 4.95  | -1.2 | -1.5 | 1.7  | -    | 78.87  | -19.51 | 98.67  | 0.00   |
| 75 | Tubulin folding cofactor B OS Homo sapiens GN TBCB PE 1 SV 2                              | TBCB_HUMAN  | Q99426 | 4.86 | 27611 | 973.4984 | 2  | 7.79  | -1.5 | -1.4 | -1.4 | -    | -99.12 | -98.73 | -99.53 | -62.61 |
| 76 | Keratin type II cytoskeletal 5 OS Homo sapiens GN KRT5 PE 1 SV 3                          | K2C5_HUMAN  | P13647 | 7.79 | 62607 | 1452.75  | 9  | 6.1   | 17   | 1.9  | 1.7  | 1.4  | 100.00 | 97.31  | 88.40  | 92.23  |
| 77 | HLA class I histocompatibility antigen B 7 alpha chain OS Homo sapiens GN HLA B PE 1 SV 3 | 1B07_HUMAN  | P01889 | 5.47 | 40802 | 22994.44 | 13 | 23.48 | 11.2 | -1   | 27.4 | 1.9  | 100.00 | -1.73  | 100.00 | 99.29  |
| 78 | Keratin type I cytoskeletal 16 OS Homo sapiens GN KRT16 PE 1 SV 4                         | K1C16_HUMAN | P08779 | 4.79 | 51610 | 1698.697 | 11 | 6.34  | 7.9  | -1.2 | 1.5  | -2.3 | 100.00 | -96.85 | 99.13  | -99.49 |
| 79 | Keratin type I cytoskeletal 9 OS Homo sapiens GN KRT9 PE 1 SV 3                           | K1C9_HUMAN  | P35527 | 4.96 | 62293 | 19456.53 | 23 | 12.04 | 7.8  | -1.3 | -1.4 | -1.3 | 100.00 | -96.47 | -97.88 | -99.82 |
| 80 | Beta actin like protein 2 OS Homo sapiens GN ACTBL2 PE 1 SV 2                             | ACTBL_HUMAN | Q562R1 | 5.25 | 42345 | 22634.47 | 16 | 12.5  | 7.3  | -2.5 | 1.4  | 1.4  | 73.41  | -92.67 | 83.32  | 91.68  |
| 81 | Keratin type I cytoskeletal 14 OS Homo sapiens GN KRT14 PE 1 SV 4                         | K1C14_HUMAN | P02533 | 4.9  | 51904 | 1729.375 | 12 | 11.44 | 6.8  | -1.5 | -2.5 | -1.2 | 99.96  | -75.84 | -90.78 | -99.73 |

|    |                                                                                    |             |        |      |        |          |    |       |            |             |             |             |        |        |        |        |
|----|------------------------------------------------------------------------------------|-------------|--------|------|--------|----------|----|-------|------------|-------------|-------------|-------------|--------|--------|--------|--------|
| 82 | Phosphate carrier protein mitochondrial OS Homo sapiens GN SLC25A3 PE 1 SV 2       | MPCP_HUMAN  | Q00325 | 9.64 | 40551  | 6295.737 | 10 | 4.42  | <b>6.6</b> | <b>5.6</b>  | <b>2.6</b>  | <b>1.8</b>  | 99.29  | 99.79  | 99.96  | 84.36  |
| 83 | Farnesyl pyrophosphate synthase OS Homo sapiens GN FDPS PE 1 SV 4                  | FPPS_HUMAN  | P14324 | 5.76 | 48789  | 1568.635 | 7  | 2.63  | <b>6.1</b> | <b>3.1</b>  | <b>3.9</b>  | <b>1.6</b>  | 99.91  | 99.99  | 98.43  | 99.56  |
| 84 | Keratin type II cytoskeletal 1 OS Homo sapiens GN KRT1 PE 1 SV 6                   | K2C1_HUMAN  | P04264 | 8.27 | 66210  | 26970.44 | 27 | 4.66  | <b>5.8</b> | <b>-1.3</b> | <b>-1.4</b> | <b>-1.4</b> | 100.00 | -92.01 | -96.68 | -99.07 |
| 85 | ATP dependent RNA helicase A OS Homo sapiens GN DHX9 PE 1 SV 4                     | DHX9_HUMAN  | Q08211 | 6.39 | 142270 | 719.1813 | 9  | 6.22  | <b>5.7</b> | <b>6.1</b>  | <b>3.2</b>  | <b>-1.7</b> | 100.00 | 100.00 | 99.99  | -99.95 |
| 86 | UTP glucose 1 phosphate uridylyltransferase OS Homo sapiens GN UGP2 PE 1 SV 5      | UGPA_HUMAN  | Q16851 | 8.31 | 57111  | 2389.885 | 14 | 6.5   | <b>5.3</b> | <b>1.8</b>  | <b>3.1</b>  | <b>-1.4</b> | 100.00 | 95.68  | 99.21  | -98.47 |
| 87 | Proteolipid protein 2 OS Homo sapiens GN PLP2 PE 1 SV 1                            | PLP2_HUMAN  | Q04941 | 7.01 | 17033  | 6455.277 | 4  | 8.55  | <b>5.3</b> | <b>2.6</b>  | <b>5.6</b>  | <b>1.1</b>  | 99.98  | 99.69  | 99.99  | 63.76  |
| 88 | Mitogen activated protein kinase 3 OS Homo sapiens GN MAPK3 PE 1 SV 4              | MK03_HUMAN  | P27361 | 6.29 | 43478  | 1695.877 | 12 | 7.12  | <b>5.2</b> | <b>-1.4</b> | <b>2.2</b>  | <b>1.1</b>  | 99.99  | -74.87 | 99.72  | 21.12  |
| 89 | Organic solute transporter subunit beta OS Homo sapiens GN SLC51B PE 2 SV 2        | OSTB_HUMAN  | Q86UW2 | 4.38 | 14346  | 2135.313 | 3  | 34.38 | <b>5.2</b> | <b>2.4</b>  | <b>4.6</b>  | <b>-1.1</b> | 96.19  | 99.13  | 99.06  | -10.36 |
| 90 | Transmembrane emp24 domain containing protein 7 OS Homo sapiens GN TMED7 PE 1 SV 2 | TMED7_HUMAN | Q9Y3B3 | 6.49 | 25514  | 2811.043 | 4  | 10.27 | <b>5.1</b> | <b>10</b>   | <b>6.5</b>  | <b>1.4</b>  | 99.97  | 99.88  | 99.98  | 78.12  |
| 91 | Ras related protein Rap 1A OS Homo sapiens GN RAP1A PE 1 SV 1                      | RAP1A_HUMAN | P62834 | 6.53 | 21329  | 2954.511 | 5  | 6.52  | <b>4.4</b> | <b>1.6</b>  | <b>6.9</b>  | <b>6.2</b>  | 99.65  | 99.79  | 100.00 | 99.92  |
| 92 | Glutathione S transferase Mu 2 OS Homo sapiens GN GSTM2 PE 1 SV 2                  | GSTM2_HUMAN | P28161 | 5.95 | 25916  | 3363.97  | 9  | 27.52 | <b>4.4</b> | <b>9.8</b>  | <b>-1.9</b> | <b>1.2</b>  | 99.99  | 99.89  | -97.42 | 65.31  |
| 93 | Peptidyl prolyl cis trans isomerase A like 4G OS Homo sapiens GN PPIAL4G PE 2 SV 1 | PAL4G_HUMAN | A2BFH1 | 9.44 | 18394  | 2940.364 | 2  | 20.73 | <b>3.3</b> | <b>-6.6</b> | <b>4.3</b>  | <b>3.8</b>  | 99.99  | -99.52 | 98.31  | 92.66  |

|     |                                                                                                    |             |        |      |        |          |    |       |     |      |      |       |        |        |        |        |
|-----|----------------------------------------------------------------------------------------------------|-------------|--------|------|--------|----------|----|-------|-----|------|------|-------|--------|--------|--------|--------|
| 94  | Guanine nucleotide binding protein G s subunit alpha isoforms XLas OS Homo sapiens GN GNAS PE 1 SV | GNAS1_HUMAN | Q5JWF2 | 4.72 | 111766 | 2894.66  | 11 | 4.82  | 3.1 | 2.4  | 1.7  | -7.3  | 99.87  | 98.42  | 97.16  | -99.82 |
| 95  | Leukocyte elastase inhibitor OS Homo sapiens GN SERPINB1 PE 1 SV 1                                 | ILEU_HUMAN  | P30740 | 5.85 | 42856  | 1372.522 | 4  | 6.6   | 3   | -1.1 | 5.2  | 2.7   | 97.62  | -9.22  | 99.87  | 99.82  |
| 96  | Lactadherin OS Homo sapiens GN MFGE8 PE 1 SV 2                                                     | MFGM_HUMAN  | Q08431 | 8.06 | 43921  | 9587.251 | 21 | 12.92 | 2.7 | -3.3 | 6    | 3     | 99.91  | -99.98 | 100.00 | 100.00 |
| 97  | Pyridoxal kinase OS Homo sapiens GN PDXK PE 1 SV 1                                                 | PDXK_HUMAN  | O00764 | 5.7  | 35330  | 10159.11 | 11 | 19.87 | 2.7 | 5.2  | 3.9  | 2.3   | 99.99  | 99.99  | 100.00 | 99.99  |
| 98  | Glutamyl aminopeptidase OS Homo sapiens GN ENPEP PE 1 SV 3                                         | AMPE_HUMAN  | Q07075 | 5.15 | 109758 | 1291.259 | 14 | 3.66  | 2.3 | 7.9  | 3    | -1.7  | 99.90  | 100.00 | 99.97  | -46.00 |
| 99  | Membrane associated progesterone receptor component 1 OS Homo sapiens GN PGRMC1 PE 1 SV 3          | PGRC1_HUMAN | O00264 | 4.34 | 21785  | 11208.57 | 4  | 14.36 | 2.3 | 3.2  | 1.1  | 10.1  | 98.12  | 99.69  | -29.95 | 99.98  |
| 100 | Peptidyl prolyl cis trans isomerase A like 4D OS Homo sapiens GN PPIAL4D PE 3 SV 1                 | PAL4D_HUMAN | F5H284 | 9.76 | 18395  | 23780.8  | 4  | 12.8  | 2.3 | 1.9  | 1.5  | -25.5 | 99.87  | 99.86  | 88.08  | -96.01 |
| 101 | Heterogeneous nuclear ribonucleoprotein C like 1 OS Homo sapiens GN HNRNPCL1 PE 1 SV 1             | HNRCL_HUMAN | O60812 | 4.74 | 32199  | 2749.721 | 4  | 15.36 | 1.9 | 1.5  | 9.3  | 1.3   | 99.42  | 86.64  | 100.00 | 94.61  |
| 102 | Fumarylacetoacetate hydrolase domain containing protein 2A OS Homo sapiens GN FAHD2A PE 1 SV 1     | FAH2A_HUMAN | Q96GK7 | 8.28 | 34938  | 1646.508 | 8  | 24.84 | 1.9 | 1.2  | -1.1 | -20.7 | 98.92  | 48.66  | -20.43 | -87.75 |
| 103 | Tryptophan tRNA ligase cytoplasmic OS Homo sapiens GN WARS PE 1 SV 2                               | SYWC_HUMAN  | P23381 | 5.78 | 53508  | 27537.11 | 26 | 9.13  | 1.8 | -2.4 | 1.2  | 11.9  | 100.00 | -99.99 | 97.66  | 99.99  |
| 104 | GTP binding protein SAR1b OS Homo sapiens GN SAR1B PE 1 SV 1                                       | SAR1B_HUMAN | Q9Y6B6 | 5.69 | 22524  | 1850.109 | 5  | 23.23 | 1.6 | 2.2  | -3.7 | -6.6  | 96.20  | 99.91  | -99.64 | -99.64 |
| 105 | Delta 3 5 Delta 2 4 dienoyl CoA isomerase mitochondrial OS Homo sapiens GN ECH1 PE 1 SV 2          | ECH1_HUMAN  | Q13011 | 8    | 36158  | 1373.085 | 8  | 11.59 | 1.6 | 1.8  | 1.8  | 5     | 99.86  | 99.99  | 99.97  | 99.99  |



|     |                                                                                                     |             |        |       |        |          |    |       |     |      |      |      |       |        |        |        |
|-----|-----------------------------------------------------------------------------------------------------|-------------|--------|-------|--------|----------|----|-------|-----|------|------|------|-------|--------|--------|--------|
| 106 | HLA class I histocompatibility antigen B 41 alpha chain OS Homo sapiens GN HLA B PE 1 SV 1          | 1B41_HUMAN  | P30479 | 6.08  | 40881  | 25085.64 | 15 | 25.41 | 1.5 | -1.5 | 3.5  | 10.6 | 99.99 | -82.18 | 99.99  | 100.00 |
| 107 | Putative heat shock protein HSP 90 beta 3 OS Homo sapiens GN HSP90AB3P PE 5 SV 1                    | H90B3_HUMAN | Q58FF7 | 4.51  | 68667  | 20672.39 | 20 | 6.03  | 1.4 | 10.6 | -1.9 | 9.9  | 93.60 | 100.00 | -99.96 | 99.42  |
| 108 | High mobility group protein B2 OS Homo sapiens GN HMGB2 PE 1 SV 2                                   | HMGB2_HUMAN | P26583 | 7.94  | 24205  | 6490.066 | 9  | 2.87  | 1.4 | 5.7  | 2    | -1.2 | 95.89 | 99.86  | 68.15  | -94.42 |
| 109 | Serine hydroxymethyltransferase cytosolic OS Homo sapiens GN SHMT1 PE 1 SV 1                        | GLYC_HUMAN  | P34896 | 7.53  | 53653  | 944.2294 | 2  | 10.77 | 1.3 | -1.1 | 1.2  | 10   | 84.28 | -60.11 | 92.06  | 100.00 |
| 110 | HLA class I histocompatibility antigen B 73 alpha chain OS Homo sapiens GN HLA B PE 1 SV 1          | 1B73_HUMAN  | Q31612 | 5.8   | 40834  | 19057.28 | 11 | 24.79 | 1.3 | -7.7 | 3.1  | 4.5  | 98.00 | -99.95 | 100.00 | 100.00 |
| 111 | Erythrocyte band 7 integral membrane protein OS Homo sapiens GN STOM PE 1 SV 3                      | STOM_HUMAN  | P27105 | 7.99  | 31902  | 14084.52 | 7  | 12.5  | 1.3 | -1.3 | 1.5  | 15   | 84.44 | 20.14  | 84.71  | 100.00 |
| 112 | Activated RNA polymerase II transcriptional coactivator p15 OS Homo sapiens GN SUB1 PE 1 SV 3       | TCP4_HUMAN  | P53999 | 10.07 | 14395  | 5232.502 | 4  | 8.66  | 1.3 | 1.5  | -8.8 | -1   | 41.39 | 96.22  | -99.60 | -8.90  |
| 113 | Inactive tyrosine protein kinase 7 OS Homo sapiens GN PTK7 PE 1 SV 2                                | PTK7_HUMAN  | Q13308 | 6.66  | 119875 | 3838.873 | 18 | 5.14  | 1.2 | 1.1  | 1.1  | 15.6 | 99.70 | 81.26  | 85.83  | 99.99  |
| 114 | Core histone macro H2A 1 OS Homo sapiens GN H2AFY PE 1 SV 4                                         | H2AY_HUMAN  | O75367 | 10.23 | 39788  | 2871.756 | 9  | 15.59 | 1.2 | 2.3  | 1.4  | 5.4  | 99.89 | 99.92  | 99.84  | 100.00 |
| 115 | Phosphoserine aminotransferase OS Homo sapiens GN PSAT1 PE 1 SV 2                                   | SERC_HUMAN  | Q9Y617 | 7.59  | 40822  | 12543.34 | 23 | 8.38  | 1.2 | 1.2  | -1.3 | 15.5 | 98.70 | 89.77  | -98.92 | 100.00 |
| 116 | Guanine nucleotide binding protein G s subunit alpha isoforms short OS Homo sapiens GN GNAS PE 1 SV | GNAS2_HUMAN | P63092 | 5.47  | 46121  | 2821.014 | 9  | 6.6   | 1.2 | 1.2  | 1.8  | 5.1  | 77.17 | 79.21  | 94.61  | 100.00 |

|     |                                                                                             |             |        |      |        |          |    |       |      |       |       |       |        |         |         |         |
|-----|---------------------------------------------------------------------------------------------|-------------|--------|------|--------|----------|----|-------|------|-------|-------|-------|--------|---------|---------|---------|
| 117 | CD82 antigen OS Homo sapiens GN CD82 PE 1 SV 1                                              | CD82_HUMAN  | P27701 | 4.98 | 30253  | 2024.045 | 5  | 17.23 | 1.2  | -6.1  | 1.1   | -6.8  | 66.60  | -99.31  | 21.26   | -99.54  |
| 118 | Deoxynucleoside triphosphate triphosphohydrolase SAMHD1 OS Homo sapiens GN SAMHD1 PE 1 SV 2 | SAMH1_HUMAN | Q9Y3Z3 | 6.71 | 72942  | 3509.442 | 13 | 6.71  | 1.2  | -1    | 3.5   | 10.1  | 75.69  | -36.62  | 100.00  | 100.00  |
| 119 | Serine arginine rich splicing factor 1 OS Homo sapiens GN SRSF1 PE 1 SV 2                   | SRSF1_HUMAN | Q07955 | 10.6 | 27859  | 4283.672 | 13 | 11.29 | 1.1  | 1.9   | -16.2 | 1.2   | 82.81  | 99.98   | -99.99  | 91.75   |
| 120 | Elongation factor 1 alpha 2 OS Homo sapiens GN EEF1A2 PE 1 SV 1                             | EF1A2_HUMAN | Q05639 | 9.35 | 50812  | 17340.53 | 19 | 10.37 | 1.1  | -35.2 | -4.2  | -1.5  | 26.79  | -99.84  | -99.51  | -100.00 |
| 121 | CD63 antigen OS Homo sapiens GN CD63 PE 1 SV 2                                              | CD63_HUMAN  | P08962 | 7.72 | 26492  | 2782.077 | 2  | 2.52  | 1.1  | -8    | 1.2   | -1.7  | 59.35  | -100.00 | 98.40   | -13.81  |
| 122 | Aflatoxin B1 aldehyde reductase member 4 OS Homo sapiens GN AKR7L PE 2 SV 6                 | ARK74_HUMAN | Q8NHP1 | 6.28 | 37213  | 1193.045 | 2  | 11.18 | 1    | 1.5   | -5.9  | 2.2   | -56.66 | 97.41   | -99.70  | 99.88   |
| 123 | Nucleolin OS Homo sapiens GN NCL PE 1 SV 3                                                  | NUCL_HUMAN  | P19338 | 4.4  | 76672  | 4076.04  | 20 | 2.11  | 1    | 1.4   | -6.1  | -1.2  | 4.45   | 99.31   | -99.99  | -91.52  |
| 124 | RNA binding motif protein X linked like 3 OS Homo sapiens GN RBMXL3 PE 2 SV 2               | RMXL3_HUMAN | Q8N7X1 | 9.15 | 115793 | 1049.455 | 2  | 2.72  | -1.1 | 1.7   | 8.2   | 2     | -56.10 | 81.45   | 99.96   | 99.59   |
| 125 | Polypyrimidine tract binding protein 2 OS Homo sapiens GN PTBP2 PE 1 SV 1                   | PTBP2_HUMAN | Q9UKA9 | 8.98 | 57605  | 702.1445 | 2  | 6.97  | -1.1 | 1.4   | 1.1   | -15.6 | 82.61  | 96.86   | 92.93   | -86.65  |
| 126 | Protein tweety homolog 3 OS Homo sapiens GN TTYH3 PE 1 SV 3                                 | TTYH3_HUMAN | Q9C0H2 | 5.04 | 58514  | 3665.679 | 8  | 4.97  | -1.2 | -11.3 | -1.8  | -1.3  | -66.74 | -99.89  | -98.35  | -67.82  |
| 127 | Neutral cholesterol ester hydrolase 1 OS Homo sapiens GN NCEH1 PE 1 SV 3                    | NCEH1_HUMAN | Q6PIU2 | 6.85 | 46093  | 1285.842 | 5  | 11.76 | -1.2 | -5.7  | -2    | -1.2  | -98.94 | -100.00 | -99.99  | -97.18  |
| 128 | Thymidine phosphorylase OS Homo sapiens GN TYMP PE 1 SV 2                                   | TYPH_HUMAN  | P19971 | 5.21 | 50355  | 1853.895 | 7  | 3.11  | -1.2 | 1.1   | 8.6   | 3.2   | -30.15 | 14.67   | 100.00  | 99.99   |
| 129 | Catalase OS Homo sapiens GN CAT PE 1 SV 3                                                   | CATA_HUMAN  | P04040 | 6.97 | 59984  | 7442.282 | 21 | 7.02  | -1.2 | 5.4   | 1.2   | 1.2   | -97.60 | 100.00  | 77.50   | 88.07   |
| 130 | 14 3 3 protein sigma OS Homo sapiens GN SFN PE 1 SV 1                                       | 1433S_HUMAN | P31947 | 4.48 | 27888  | 6397.539 | 5  | 4.03  | -1.2 | -1.1  | -69.3 | -1.1  | -99.09 | -92.89  | -100.00 | -38.60  |

|     |                                                                                            |             |        |      |        |          |    |       |      |       |       |       |        |         |        |         |
|-----|--------------------------------------------------------------------------------------------|-------------|--------|------|--------|----------|----|-------|------|-------|-------|-------|--------|---------|--------|---------|
| 131 | Putative tubulin beta chain like protein ENSP00000290377 OS Homo sapiens PE 5 SV 2         | YI016_HUMAN | A6NKZ8 | 4.57 | 42231  | 13847.46 | 9  | 10.48 | -1.2 | -43.4 | -1.2  | -29.6 | -97.50 | -100.00 | -98.13 | -99.96  |
| 132 | HLA class I histocompatibility antigen A 68 alpha chain OS Homo sapiens GN HLA A PE 1 SV 4 | 1A68_HUMAN  | P01891 | 6.23 | 41194  | 15599.33 | 13 | 24.66 | -1.3 | -5.2  | -2.5  | 5.2   | -96.30 | -99.96  | -99.84 | 99.10   |
| 133 | CD9 antigen OS Homo sapiens GN CD9 PE 1 SV 4                                               | CD9_HUMAN   | P21926 | 6.9  | 25986  | 19258    | 5  | 21.05 | -1.3 | 4.6   | 6.4   | -1.2  | -99.15 | 99.61   | 100.00 | -78.96  |
| 134 | UDP N acetylhexosamine pyrophosphorylase OS Homo sapiens GN UAP1 PE 1 SV 3                 | UAP1_HUMAN  | Q16222 | 5.89 | 59168  | 3515.12  | 9  | 8.24  | -1.6 | -4.9  | -2.3  | -7    | -98.39 | -100.00 | -99.76 | -100.00 |
| 135 | Myosin light chain 6B OS Homo sapiens GN MYL6B PE 1 SV 1                                   | MYL6B_HUMAN | P14649 | 5.42 | 22878  | 31199.26 | 3  | 13.46 | -1.8 | 1.2   | -1.4  | 211   | -97.39 | 74.45   | -87.68 | 99.99   |
| 136 | Serine threonine protein phosphatase 5 OS Homo sapiens GN PPP5C PE 1 SV 1                  | PPP5_HUMAN  | P53041 | 5.84 | 57449  | 890.6174 | 5  | 4.81  | -1.9 | 1     | -1.1  | -1.1  | -99.34 | 7.98    | -28.62 | -43.65  |
| 137 | High mobility group protein B1 OS Homo sapiens GN HMGB1 PE 1 SV 3                          | HMGB1_HUMAN | P09429 | 5.45 | 25065  | 10294.76 | 8  | 2.79  | -1.9 | 1.2   | -10.5 | -1.1  | -99.54 | 98.44   | -99.99 | -50.29  |
| 138 | POTE ankyrin domain family member E OS Homo sapiens GN POTEE PE 1 SV 3                     | POTEE_HUMAN | Q6S8J3 | 5.77 | 122961 | 30739.02 | 25 | 8.84  | -2.1 | 37.9  | 51.9  | 28.4  | -99.82 | 100.00  | 100.00 | 100.00  |
| 139 | Alpha 2 macroglobulin OS Homo sapiens GN A2M PE 1 SV 3                                     | A2MG_HUMAN  | P01023 | 6    | 164717 | 1575.234 | 12 | 4.82  | -2.3 | -3.8  | -2.7  | -56.8 | -99.98 | -99.99  | -99.98 | -100.00 |
| 140 | Acetyl CoA acetyltransferase mitochondrial OS Homo sapiens GN ACAT1 PE 1 SV 1              | THIL_HUMAN  | P24752 | 9.12 | 45485  | 5095.615 | 17 | 21.08 | -2.8 | -1.5  | -1.2  | -5.3  | -96.09 | -64.05  | -36.42 | -93.65  |
| 141 | C 1 tetrahydrofolate synthase cytoplasmic OS Homo sapiens GN MTHFD1 PE 1 SV 3              | C1TC_HUMAN  | P11586 | 6.91 | 102244 | 1495.12  | 24 | 2.78  | -2.9 | -1.1  | -1.1  | -6    | -61.40 | -6.57   | -5.97  | -99.92  |
| 142 | HLA class I histocompatibility antigen B 13 alpha chain OS Homo sapiens GN HLA B PE 2 SV 1 | 1B13_HUMAN  | P30461 | 5.72 | 40817  | 14769.7  | 9  | 22.38 | -2.9 | -3.8  | -6.9  | 16.3  | -99.97 | -99.88  | -99.99 | 99.95   |

|     |                                                                                             |             |        |       |        |          |    |       |      |      |      |      |        |        |         |         |        |
|-----|---------------------------------------------------------------------------------------------|-------------|--------|-------|--------|----------|----|-------|------|------|------|------|--------|--------|---------|---------|--------|
| 143 | 60S ribosomal protein L26 OS Homo sapiens GN RPL26 PE 1 SV 1                                | RL26_HUMAN  | P61254 | 10.98 | 17258  | 3027.559 | 3  | 10.34 | -3   | 1.1  | -5.2 | 1.6  | -99.99 | 51.08  | -99.99  | 97.90   |        |
| 144 | 40S ribosomal protein S14 OS Homo sapiens GN RPS14 PE 1 SV 3                                | RS14_HUMAN  | P62263 | 10.53 | 16444  | 15083.68 | 11 | 31.13 | -3   | -2.1 | -5.4 | -1.5 | -99.96 | -99.90 | -99.99  | -99.79  |        |
| 145 | Transforming growth factor beta induced protein ig h3 OS Homo sapiens GN TGFBI PE 1 SV 1    | BGH3_HUMAN  | Q15582 | 7.52  | 75308  | 10586.17 | 17 | 9.81  | -3.1 | -3.8 | -6.1 | 16.3 | -99.98 | -99.99 | -100.00 | 100.00  |        |
| 146 | HLA class I histocompatibility antigen Cw 16 alpha chain OS Homo sapiens GN HLA C PE 2 SV 1 | 1C16_HUMAN  | Q29960 | 6.08  | 41266  | 21197.58 | 11 | 25.96 | -3.1 | -3   | -1.6 | 5.5  | -87.28 | -86.01 | -65.92  | 99.99   |        |
| 147 | Coatomer subunit beta OS Homo sapiens GN COPB2 PE 1 SV 2                                    | COPB2_HUMAN | P35606 | 4.97  | 103343 | 3793.894 | 43 | 8.94  | -3.6 | 1.2  | -1.2 | -5.6 | -65.68 | 24.10  | -16.57  | -100.00 |        |
| 148 | Serotransferrin OS Homo sapiens GN TF PE 1 SV 3                                             | TRFE_HUMAN  | P02787 | 6.75  | 79345  | 65982.49 | 48 | 7.45  | -3.7 | -3.4 | -2.6 | 9    | -      | 100.00 | -100.00 | -100.00 | 100.00 |
| 149 | Eukaryotic translation initiation factor 5A 2 OS Homo sapiens GN EIF5A2 PE 1 SV 3           | IF5A2_HUMAN | Q9GZV4 | 5.24  | 17135  | 7698.182 | 8  | 41.83 | -3.7 | -1.5 | -2.7 | -5.3 | -99.98 | -99.32 | -99.97  | -99.99  |        |
| 150 | 60S ribosomal protein L5 OS Homo sapiens GN RPL5 PE 1 SV 3                                  | RL5_HUMAN   | P46777 | 10.02 | 34591  | 6575.533 | 10 | 13.8  | -4.2 | -1   | -8.1 | -1.4 | -99.97 | -26.98 | -99.98  | -96.27  |        |
| 151 | Protein CYR61 OS Homo sapiens GN CYR61 PE 1 SV 1                                            | CYR61_HUMAN | O00622 | 8.09  | 44194  | 2089.063 | 5  | 10.24 | -4.6 | -2.3 | -5.9 | -2.6 | -99.99 | -99.97 | -99.99  | -100.00 |        |
| 152 | Epoxide hydrolase 1 OS Homo sapiens GN EPHX1 PE 1 SV 1                                      | HYEP_HUMAN  | P07099 | 6.84  | 53177  | 3893.229 | 18 | 3.96  | -4.7 | -2.2 | -2.2 | -7   | -      | 100.00 | -100.00 | -100.00 | -99.99 |
| 153 | Valine tRNA ligase OS Homo sapiens GN VARS PE 1 SV 4                                        | SYVC_HUMAN  | P26640 | 7.36  | 141731 | 1580.284 | 33 | 3.48  | -5   | -2.1 | -2.9 | -1.2 | -99.99 | -99.96 | -99.98  | -93.03  |        |
| 154 | NAD P H dehydrogenase quinone 1 OS Homo sapiens GN NQO1 PE 1 SV 1                           | NQO1_HUMAN  | P15559 | 9.26  | 30925  | 18933.26 | 11 | 16.06 | -5.1 | -9.1 | -4.3 | 1.5  | -      | 100.00 | -100.00 | -100.00 | 99.19  |
| 155 | Carbonyl reductase NADPH 3 OS Homo sapiens GN CBR3 PE 1 SV 3                                | CBR3_HUMAN  | O75828 | 5.75  | 31249  | 6834.446 | 9  | 8.66  | -5.1 | 1.7  | -1.4 | 2    | -90.67 | 82.22  | -43.60  | 98.77   |        |
| 156 | Histone H4 OS Homo sapiens GN HIST1H4A PE 1 SV 2                                            | H4_HUMAN    | P62805 | 11.77 | 11367  | 78191.55 | 10 | 17.48 | -5.2 | 1.1  | -1.2 | 1.6  | -      | 100.00 | 81.06   | -98.77  | 100.00 |

|     |                                                                                     |             |        |       |        |          |    |       |      |      |      |       |        |         |         |         |
|-----|-------------------------------------------------------------------------------------|-------------|--------|-------|--------|----------|----|-------|------|------|------|-------|--------|---------|---------|---------|
| 157 | Integrin alpha 2 OS Homo sapiens GN ITGA2 PE 1 SV 1                                 | ITA2_HUMAN  | P17301 | 4.99  | 130550 | 1191.372 | 10 | 4.57  | -5.2 | 1.3  | 1.4  | 1     | -95.40 | 48.61   | 51.89   | 42.67   |
| 158 | Hemoglobin subunit epsilon OS Homo sapiens GN HBE1 PE 1 SV 2                        | HBE_HUMAN   | P02100 | 9.18  | 16260  | 8652.665 | 3  | 8.16  | -5.3 | -1.4 | -1.6 | -6.1  | -99.78 | -94.28  | -80.50  | -99.98  |
| 159 | Guanine nucleotide binding protein G t subunit alpha 2 OS                           | GNAT2_HUMAN | P19087 | 4.93  | 40746  | 2288.561 | 5  | 7.34  | -5.6 | -2   | -1.3 | -4.4  | -99.94 | -94.64  | -94.17  | -96.19  |
| 160 | 40S ribosomal protein S25 OS Homo sapiens GN RPS25 PE 1 SV 1                        | RS25_HUMAN  | P62851 | 10.58 | 13799  | 12280.78 | 4  | 21.6  | -5.9 | -2.8 | -5.3 | -1.1  | -99.46 | -98.43  | -99.44  | -64.09  |
| 161 | Histone H2A x OS Homo sapiens GN H2AFX PE 1 SV 2                                    | H2AX_HUMAN  | P16104 | 11.16 | 15145  | 60892.66 | 6  | 11.89 | -6.2 | 1.2  | -1.7 | 2     | -      | 98.15   | -99.99  | 99.89   |
| 162 | Niban like protein 1 OS Homo sapiens GN FAM129B PE 1 SV 3                           | NIBL1_HUMAN | Q96TA1 | 5.76  | 84651  | 3471.417 | 27 | 2.68  | -6.7 | -2.4 | -1.7 | -6.6  | -      | -100.00 | -99.91  | -100.00 |
| 163 | Hemoglobin subunit alpha OS Homo sapiens GN HBA1 PE 1 SV 2                          | HBA_HUMAN   | P69905 | 9.18  | 15315  | 21076.16 | 6  | 8.45  | -6.9 | 2.1  | 1.4  | 1     | -      | 99.84   | 99.97   | 88.01   |
| 164 | V type proton ATPase subunit F OS Homo sapiens GN ATP6V1F PE 1 SV 2                 | VATF_HUMAN  | Q16864 | 5.15  | 13370  | 2184.358 | 2  | 15.97 | -7   | -3.2 | -2.2 | -13.1 | -99.98 | -99.96  | -99.87  | -99.62  |
| 165 | Lactotransferrin OS Homo sapiens GN LTF PE 1 SV 6                                   | TRFL_HUMAN  | P02788 | 8.01  | 80064  | 3377.094 | 14 | 14.37 | -7   | -2.9 | -2.7 | -14.7 | -      | -100.00 | -100.00 | -100.00 |
| 166 | 60S ribosomal protein L11 OS Homo sapiens GN RPL11 PE 1 SV 2                        | RL11_HUMAN  | P62913 | 9.95  | 20481  | 5629.544 | 5  | 8.99  | -7.3 | -3.4 | -7.4 | -1.3  | -      | -100.00 | -100.00 | -97.37  |
| 167 | V type proton ATPase subunit B kidney isoform OS Homo sapiens GN ATP6V1B1 PE 1 SV 3 | VATB1_HUMAN | P15313 | 5.31  | 57232  | 1084.387 | 9  | 12.28 | -7.5 | 1.2  | -5.1 | 1.8   | -99.81 | 65.17   | -99.73  | 99.98   |
| 168 | Interferon induced GTP binding protein Mx2 OS Homo sapiens GN MX2 PE 1 SV 1         | MX2_HUMAN   | P20592 | 8.99  | 82545  | 1456.002 | 6  | 8.25  | -7.5 | -3.6 | -1.9 | 1.4   | -43.37 | -48.09  | 40.49   | 89.01   |
| 169 | Nucleoside diphosphate kinase A OS Homo sapiens GN NME1 PE 1 SV 1                   | NDKA_HUMAN  | P15531 | 5.77  | 17320  | 24311.76 | 6  | 42.11 | -7.9 | -1.3 | 6.1  | -1.2  | -99.97 | -88.88  | 99.99   | -99.29  |
| 170 | Histone H3 2 OS Homo sapiens GN HIST2H3A PE 1 SV 3                                  | H32_HUMAN   | Q71DI3 | 11.68 | 15445  | 44556.89 | 8  | 4.41  | -7.9 | -1.3 | -1.9 | 1.2   | -99.99 | -98.54  | -99.92  | 83.83   |
| 171 | ATP dependent RNA helicase DDX39A OS Homo sapiens GN DDX39A PE 1 SV 2               | DX39A_HUMAN | O00148 | 5.33  | 49643  | 5421.293 | 20 | 24.36 | -8.3 | -2.1 | -1.3 | -4.1  | -      | -99.97  | -99.67  | -100.00 |

|     |                                                                                             |             |        |       |        |          |    |       |              |              |              |              |        |        |         |         |         |
|-----|---------------------------------------------------------------------------------------------|-------------|--------|-------|--------|----------|----|-------|--------------|--------------|--------------|--------------|--------|--------|---------|---------|---------|
| 172 | Putative elongation factor 1 alpha like 3 OS Homo sapiens GN EEF1A1P5 PE 5 SV 1             | EF1A3_HUMAN | Q5VTE0 | 9.41  | 50527  | 34437.56 | 20 | 19.26 | <b>-8.7</b>  | <b>-1.1</b>  | <b>-1.2</b>  | <b>-1.2</b>  | -      | 100.00 | -76.84  | -99.66  | -97.60  |
| 173 | Tubulin beta 8 chain like protein LOC260334 OS Homo sapiens PE 1 SV 1                       | TBB8L_HUMAN | A6NNZ2 | 4.56  | 50200  | 27595.83 | 10 | 11.71 | <b>-9.2</b>  | <b>-1.2</b>  | <b>-12</b>   | <b>-5.4</b>  | -      | 100.00 | -96.05  | -100.00 | -99.44  |
| 174 | 60S ribosomal protein L12 OS Homo sapiens GN RPL12 PE 1 SV 1                                | RL12_HUMAN  | P30050 | 9.9   | 17990  | 18720.47 | 7  | 30.3  | <b>-9.8</b>  | <b>-9.6</b>  | <b>-7.9</b>  | <b>-1</b>    | -99.95 | -99.95 | -99.94  | -1.57   |         |
| 175 | Hemoglobin subunit beta OS Homo sapiens GN HBB PE 1 SV 2                                    | HBB_HUMAN   | P68871 | 6.88  | 16112  | 8194.478 | 3  | 6.12  | <b>-11.5</b> | <b>1.4</b>   | <b>-1.1</b>  | <b>-2.1</b>  | -99.81 | 80.03  | -74.21  | -97.82  |         |
| 176 | HLA class I histocompatibility antigen A 3 alpha chain OS Homo sapiens GN HLA A PE 1 SV 2   | 1A03_HUMAN  | P04439 | 5.58  | 41126  | 23487.08 | 16 | 27.67 | <b>-13.8</b> | <b>-9.5</b>  | <b>-21.2</b> | <b>3.1</b>   | -      | 100.00 | -100.00 | -100.00 | 99.98   |
| 177 | Keratin type II cuticular Hb5 OS Homo sapiens GN KRT85 PE 1 SV 1                            | KRT85_HUMAN | P78386 | 6.2   | 57342  | 1344.757 | 8  | 6.31  | <b>-14.6</b> | <b>-17.4</b> | <b>-6.1</b>  | <b>-3.7</b>  | -99.39 | -99.42 | -99.11  | -98.50  |         |
| 178 | Inter alpha trypsin inhibitor heavy chain H2 OS Homo sapiens GN ITIH2 PE 1 SV 2             | ITIH2_HUMAN | P19823 | 6.4   | 106920 | 948.4495 | 10 | 6.03  | <b>-14.6</b> | <b>-3.9</b>  | <b>-2.5</b>  | <b>-7.2</b>  | -99.84 | -99.60 | -98.78  | -100.00 |         |
| 179 | 3 hydroxyisobut+te dehydrogenase mitochondrial OS Homo sapiens GN HIBADH PE 1 SV 2          | 3HIDH_HUMAN | P31937 | 8.15  | 35728  | 2318.316 | 15 | 18.45 | <b>-18.3</b> | <b>1.1</b>   | <b>1.2</b>   | <b>-3.8</b>  | -99.65 | 50.48  | 76.36   | -82.03  |         |
| 180 | Histone H2B type 1 A OS Homo sapiens GN HIST1H2BA PE 1 SV 3                                 | H2B1A_HUMAN | Q96A08 | 10.74 | 14168  | 4066.84  | 3  | 18.9  | <b>-19.4</b> | <b>-2.7</b>  | <b>-1.6</b>  | <b>-2.7</b>  | -99.97 | -99.84 | -97.84  | -99.91  |         |
| 181 | Keratin type II cuticular Hb4 OS Homo sapiens GN KRT84 PE 2 SV 2                            | KRT84_HUMAN | Q9NSB2 | 7.42  | 65983  | 2680.325 | 12 | 9.83  | <b>-22.8</b> | <b>-2.4</b>  | <b>-2.5</b>  | <b>-21.2</b> | -      | 100.00 | -100.00 | -100.00 | -100.00 |
| 182 | Tubulin alpha 8 chain OS Homo sapiens GN TUBA8 PE 1 SV 1                                    | TBA8_HUMAN  | Q9NY65 | 4.76  | 50778  | 55144.62 | 16 | 10.47 | <b>-22.9</b> | <b>-4.9</b>  | <b>-3.6</b>  | <b>-31.9</b> | -      | 100.00 | -100.00 | -100.00 | -100.00 |
| 183 | HLA class I histocompatibility antigen Cw 17 alpha chain OS Homo sapiens GN HLA C PE 1 SV 1 | 1C17_HUMAN  | Q95604 | 6.34  | 41637  | 5709.015 | 6  | 14.52 | <b>-26.7</b> | <b>-1.6</b>  | <b>2.8</b>   | <b>-1.5</b>  | -99.93 | -87.26 | 99.75   | -62.62  |         |
| 184 | Alpha fetoprotein OS Homo sapiens GN AFP PE 1 SV 1                                          | FETA_HUMAN  | P02771 | 5.36  | 70503  | 1749.228 | 10 | 4.6   | <b>-29.1</b> | <b>-3.1</b>  | <b>-1.7</b>  | <b>-47.9</b> | -      | 100.00 | -100.00 | -99.99  | -100.00 |
| 185 | Putative heat shock protein HSP 90 alpha A2 OS Homo sapiens GN HSP90AA2 PE 1 SV 2           | HS902_HUMAN | Q14568 | 4.38  | 39479  | 9550.752 | 11 | 6.71  | <b>-31.1</b> | <b>-11.9</b> | <b>-1.2</b>  | <b>-1.7</b>  | -98.46 | -98.14 | -45.58  | -99.84  |         |

|     |                                                                                                |             |        |      |        |          |    |       |              |              |              |             |        |        |        |         |
|-----|------------------------------------------------------------------------------------------------|-------------|--------|------|--------|----------|----|-------|--------------|--------------|--------------|-------------|--------|--------|--------|---------|
| 186 | DNA J homolog subfamily A member 2 OS Homo sapiens GN DNAJA2 PE 1 SV 1                         | DNJA2_HUMAN | O60884 | 6.03 | 46373  | 1355.59  | 4  | 6.07  | <b>-32.4</b> | <b>-2.1</b>  | <b>-2</b>    | <b>-6.8</b> | -99.99 | -99.84 | -99.83 | -95.11  |
| 187 | Vitronectin OS Homo sapiens GN VTN PE 1 SV 1                                                   | VTNC_HUMAN  | P04004 | 5.43 | 55104  | 4185.004 | 7  | 20.08 | <b>-44.7</b> | <b>-2</b>    | <b>-6.2</b>  | <b>-1.7</b> | -99.99 | -96.81 | -99.91 | -99.62  |
| 188 | 60S ribosomal protein L14 OS Homo sapiens GN RPL14 PE 1 SV 4                                   | RL14_HUMAN  | P50914 | 11.4 | 23546  | 4625.685 | 7  | 12.56 | <b>-45</b>   | <b>-40.6</b> | <b>-23.4</b> | <b>-1.1</b> | -99.72 | -99.72 | -99.70 | -64.33  |
| 189 | N 6 adenine specific DNA methyltransferase 2 OS Homo sapiens GN N6AMT2 PE 2 SV 1               | N6MT2_HUMAN | Q8WVE0 | 4.27 | 24905  | 1514.131 | 2  | 16.36 | <b>-45.9</b> | <b>-1.1</b>  | <b>-1</b>    | <b>-4.3</b> | -99.65 | -22.87 | -5.68  | -98.88  |
| 190 | Fumarylacetoacetate hydrolase domain containing protein 2B OS Homo sapiens GN FAHD2B PE 2 SV 1 | FAH2B_HUMAN | Q6P2I3 | 7.68 | 34955  | 1737.008 | 5  | 29.62 | <b>-58</b>   | <b>-1.8</b>  | <b>-1.7</b>  | <b>-4.6</b> | -99.84 | -95.44 | -95.44 | -76.52  |
| 191 | Alpha 2 HS glycoprotein OS Homo sapiens GN AHSG PE 1 SV 1                                      | FETUA_HUMAN | P02765 | 5.33 | 40123  | 11011.86 | 11 | 27.79 | <b>-81.1</b> | <b>-1.8</b>  | <b>-1.5</b>  | <b>-8.2</b> | -99.99 | -99.81 | -99.50 | -100.00 |
| 192 | Nestin OS Homo sapiens GN NES PE 1 SV 2                                                        | NEST_HUMAN  | P48681 | 4.15 | 177895 | 1313.037 | 34 | 12.71 | <b>-1.3</b>  | <b>-1.4</b>  | <b>-1.1</b>  | <b>-1.5</b> | -98.08 | -99.15 | -82.59 | -99.82  |
| 193 | Adipocyte plasma membrane associated protein OS Homo sapiens GN APMAP PE 1 SV 2                | APMAP_HUMAN | Q9HDC9 | 5.75 | 46652  | 3356.65  | 19 | 28.13 | <b>1</b>     | <b>1.3</b>   | <b>-1.2</b>  | <b>-1.3</b> | 5.06   | 94.43  | -69.42 | -99.11  |
| 194 | Myosin light chain kinase smooth muscle OS Homo sapiens GN MYLK PE 1 SV 4                      | MYLK_HUMAN  | Q15746 | 5.77 | 213453 | 2146.201 | 19 | 2.4   | <b>1.7</b>   | <b>4.8</b>   | <b>1.3</b>   | <b>2.6</b>  | 98.31  | 99.99  | 75.21  | 98.98   |
| 195 | Myosin 10 OS Homo sapiens GN MYH10 PE 1 SV 3                                                   | MYH10_HUMAN | P35580 | 5.27 | 229969 | 3029.458 | 56 | 4.4   | <b>1.7</b>   | <b>1.4</b>   | <b>1.2</b>   | <b>-1.1</b> | 99.79  | 98.29  | 93.04  | -34.16  |
| 196 | Myosin regulatory light chain 12A OS Homo sapiens GN MYL12A PE 1 SV 2                          | ML12A_HUMAN | P19105 | 4.45 | 19851  | 50248.41 | 11 | 44.44 | <b>1.6</b>   | <b>1</b>     | <b>1.2</b>   | <b>1</b>    | 99.96  | 34.30  | 98.22  | 90.47   |
| 197 | Myosin regulatory light chain 12B OS Homo sapiens GN MYL12B PE 1 SV 2                          | ML12B_HUMAN | O14950 | 4.49 | 19836  | 48107.02 | 11 | 44.19 | <b>1.3</b>   | <b>1.4</b>   | <b>1.4</b>   | <b>2.1</b>  | 99.68  | 99.91  | 99.91  | 100.00  |
| 198 | Tropomyosin alpha 1 chain OS Homo sapiens GN TPM1 PE 1 SV 2                                    | TPM1_HUMAN  | P09493 | 4.49 | 32766  | 17023.25 | 10 | 5.63  | <b>1.6</b>   | <b>1.4</b>   | <b>1.6</b>   | <b>-1.1</b> | 99.98  | 99.98  | 100.00 | -88.57  |
| 199 | Tropomyosin alpha 4 chain OS Homo sapiens GN TPM4 PE 1 SV 3                                    | TPM4_HUMAN  | P67936 | 4.47 | 28636  | 18189.9  | 14 | 18.95 | <b>1.9</b>   | <b>1.8</b>   | <b>2.1</b>   | <b>1.1</b>  | 99.91  | 99.92  | 99.92  | 88.52   |

|     |                                                                                |             |        |      |        |          |    |       |             |             |             |             |        |        |        |        |
|-----|--------------------------------------------------------------------------------|-------------|--------|------|--------|----------|----|-------|-------------|-------------|-------------|-------------|--------|--------|--------|--------|
| 200 | Desmin OS Homo sapiens GN DES PE 1 SV 3                                        | DESM_HUMAN  | P17661 | 5.03 | 53593  | 5545.81  | 13 | 5.53  | <b>3.3</b>  | <b>1.9</b>  | <b>2.6</b>  | <b>1.4</b>  | 99.30  | 95.84  | 92.37  | 84.06  |
| 201 | Caldesmon OS Homo sapiens GN CALD1 PE 1 SV 3                                   | CALD1_HUMAN | Q05682 | 5.44 | 93288  | 15523.95 | 23 | 4.29  | <b>1.2</b>  | <b>-1.1</b> | <b>-1.6</b> | <b>1.3</b>  | 88.84  | -92.16 | -99.47 | 99.54  |
| 202 | Peroxisomal multifunctional enzyme type 2 OS Homo sapiens GN HSD17B4 PE 1 SV 3 | DHB4_HUMAN  | P51659 | 9.08 | 80143  | 2980.72  | 24 | 7.34  | <b>1.2</b>  | <b>1.7</b>  | <b>1</b>    | <b>1.4</b>  | 67.30  | 98.09  | 2.28   | 89.36  |
| 203 | Tubulin beta 3 chain OS Homo sapiens GN TUBB3 PE 1 SV 2                        | TBB3_HUMAN  | Q13509 | 4.64 | 50889  | 51656.5  | 26 | 12.89 | <b>-1.1</b> | <b>-1</b>   | <b>1.1</b>  | <b>1.2</b>  | -92.37 | -33.07 | 68.12  | 91.11  |
| 204 | Alpha enolase OS Homo sapiens GN ENO1 PE 1 SV 2                                | ENOA_HUMAN  | P06733 | 7.17 | 47511  | 98940.22 | 29 | 21.66 | <b>-1</b>   | <b>1.3</b>  | <b>1</b>    | <b>1</b>    | -16.35 | 97.56  | 72.52  | 30.41  |
| 205 | Vimentin OS Homo sapiens GN VIM PE 1 SV 4                                      | VIME_HUMAN  | P08670 | 4.86 | 53709  | 102289.6 | 39 | 3.43  | <b>-1.5</b> | <b>-1.1</b> | <b>-1.2</b> | <b>1</b>    | -99.99 | -99.83 | -99.55 | 13.59  |
| 206 | Nucleoside diphosphate kinase A OS Homo sapiens GN NME1 PE 1 SV 1              | NDKA_HUMAN  | P15531 | 5.77 | 17320  | 24311.76 | 6  | 42.11 | <b>-7.9</b> | <b>-1.3</b> | <b>6.1</b>  | <b>-1.2</b> | -99.97 | -88.88 | 99.99  | -99.29 |
| 207 | Cadherin 13 OS Homo sapiens GN CDH13 PE 1 SV 1                                 | CAD13_HUMAN | P55290 | 4.61 | 78743  | 3344.156 | 12 | 3.37  | <b>-1.3</b> | <b>-3.7</b> | <b>-4.1</b> | <b>1.5</b>  | -95.73 | -99.91 | -99.92 | 91.88  |
| 208 | Catenin alpha 2 OS Homo sapiens GN CTNNA2 PE 1 SV 5                            | CTNA2_HUMAN | P26232 | 5.37 | 106112 | 1818.535 | 7  | 2.83  | <b>-1.3</b> | <b>1.2</b>  | <b>1.1</b>  | <b>1.6</b>  | -71.89 | 60.03  | 52.41  | 96.81  |
| 209 | Glutathione S transferase P OS Homo sapiens GN GSTP1 PE1 SV 2                  | GSTP1_HUMAN | P09211 | 5.28 | 23584  | 81527.2  | 12 | 8.57  | <b>1.5</b>  | <b>-1.2</b> | <b>1.2</b>  | <b>1.6</b>  | 99.96  | -99.06 | 98.94  | 100.00 |
| 210 | Keratin type II cytoskeletal 8 OS Homo sapiens GN KRT8 PE 1 SV 7               | K2C8_HUMAN  | P05787 | 5.34 | 53704  | 8050.384 | 24 | 14.08 | <b>-1.9</b> | <b>-1.2</b> | <b>-2.6</b> | <b>-1.7</b> | -99.99 | -80.60 | -99.98 | -90.60 |
| 211 | Keratin type I cytoskeletal 14 OS Homo sapiens GN KRT14 PE 1 SV 4              | K1C14_HUMAN | P02533 | 4.9  | 51904  | 1729.375 | 12 | 11.44 | <b>6.8</b>  | <b>-1.5</b> | <b>-2.5</b> | <b>-1.2</b> | 99.96  | -75.84 | -90.78 | -99.73 |
| 212 | Keratin type I cytoskeletal 18 OS Homo sapiens GN KRT18 PE 1 SV 2              | K1C18_HUMAN | P05783 | 5.17 | 48058  | 8460.187 | 17 | 12.33 | <b>-2</b>   | <b>-1</b>   | <b>-1.7</b> | <b>1.2</b>  | 100.00 | -85.36 | -99.94 | 56.40  |
| 213 | Keratin type I cytoskeletal 19 OS Homo sapiens GN KRT19 PE 1 SV 4              | K1C19_HUMAN | P08727 | 4.86 | 44106  | 12910.13 | 26 | 15.5  | <b>-1.2</b> | <b>-1.7</b> | <b>-1.7</b> | <b>-1.5</b> | -98.53 | -99.99 | -99.88 | -99.98 |



|     |                                                                                |             |        |      |        |          |    |       |      |      |      |      |        |        |        |        |
|-----|--------------------------------------------------------------------------------|-------------|--------|------|--------|----------|----|-------|------|------|------|------|--------|--------|--------|--------|
| 214 | Collagen alpha 1 VIII chain OS Homo sapiens GN COL8A1 PE 1 SV 2                | CO8A1_HUMAN | P27658 | 9.94 | 73478  | 1356.237 | 6  | 2.55  | 2    | 1.2  | 2    | 2.1  | 99.91  | 85.63  | 99.58  | 97.92  |
| 215 | Collagen alpha 3 VI chain OS Homo sapiens GN COL6A3 PE 1 SV 5                  | CO6A3_HUMAN | P12111 | 6.23 | 345381 | 3354.301 | 59 | 2.93  | 1.5  | 3.1  | 2.5  | 1.3  | 72.87  | 84.82  | 88.47  | 90.78  |
| 216 | Collagen alpha 1 I chain OS Homo sapiens GN COL1A1 PE 1 SV 5                   | CO1A1_HUMAN | P02452 | 5.46 | 139968 | 10166.73 | 43 | 5.4   | -1.3 | -2.7 | -1.7 | 6.1  | -97.72 | -99.95 | -99.79 | 100.00 |
| 217 | Collagen alpha 1 VI chain OS Homo sapiens GN COL6A1 PE 1 SV 3                  | CO6A1_HUMAN | P12109 | 5.09 | 109670 | 8493.603 | 29 | 7.3   | -1.4 | -1.5 | -1.2 | 1.8  | -96.22 | -82.01 | -48.52 | 99.95  |
| 218 | Integrin alpha V OS Homo sapiens GN ITGAV PE 1 SV 2                            | ITAV_HUMAN  | P06756 | 5.31 | 117122 | 7715.855 | 34 | 5.92  | 1.8  | -1.4 | 1.1  | 4.7  | 99.96  | -99.26 | 62.49  | 100.00 |
| 219 | Alpha internexin OS Homo sapiens GN INA PE 1 SV 2                              | AIXN_HUMAN  | Q16352 | 5.17 | 55562  | 1815.071 | 10 | 6.61  | -2.6 | -3.8 | -1.8 | 1.4  | -99.97 | -99.99 | -99.93 | 64.19  |
| 220 | Interferon induced transmembrane protein 3 OS Homo sapiens GN IFITM3 PE 1 SV 2 | IFM3_HUMAN  | Q01628 | 6.59 | 14803  | 22617.93 | 4  | 21.8  | 1.5  | 2.8  | 14.9 | 1.6  | 75.08  | 99.90  | 98.36  | 68.66  |
| 221 | Matrix metalloproteinase 14 OS Homo sapiens GN MMP14 PE 1 SV 3                 | MMP14_HUMAN | P50281 | 7.68 | 66236  | 2536.488 | 7  | 4.47  | 1.8  | -3.3 | 1.2  | -1.9 | 99.75  | -99.71 | 81.09  | -99.31 |
| 222 | Chloride intracellular channel protein 4 OS Homo sapiens GN CLIC4 PE 1 SV 1    | CLIC4_HUMAN | Q9Y696 | 5.29 | 29000  | 15096.56 | 16 | 15.42 | 1.9  | 1.5  | 1.9  | 1    | 99.81  | 97.38  | 99.96  | 20.50  |
| 223 | ATP synthase subunit f mitochondrial OS Homo sapiens GN ATP5JK2 PE 2 SV 3      | ATPK_HUMAN  | P56134 | 9.94 | 11032  | 18487.13 | 3  | 38.3  | 1.7  | 2.4  | 2.4  | 1.8  | 92.19  | 97.26  | 96.90  | 98.82  |
| 224 | ATP synthase subunit gamma mitochondrial OS Homo sapiens GN ATP5C1 PE 1 SV 1   | ATPG_HUMAN  | P36542 | 9.56 | 33053  | 5439.886 | 11 | 4.36  | 1.4  | 1.2  | 1.4  | 1.8  | 99.90  | 96.94  | 98.63  | 99.83  |
| 225 | ATP synthase subunit beta mitochondrial OS Homo sapiens GN ATP5B PE 1 SV 3     | ATPB_HUMAN  | P06576 | 5.1  | 56560  | 38909.08 | 27 | 15.31 | 1.3  | 1.4  | 1.5  | 1.6  | 99.86  | 99.70  | 99.75  | 99.68  |
| 226 | Perilipin 3 OS Homo sapiens GN PLIN3 PE 1 SV 3                                 | PLIN3_HUMAN | O60664 | 5.14 | 47246  | 7278.349 | 21 | 15.67 | -2.1 | -1.6 | -1.5 | -1.5 | -99.93 | -99.80 | -99.70 | -99.77 |

|     |                                                                                                     |             |         |      |       |          |    |       |      |      |      |      |        |         |        |        |
|-----|-----------------------------------------------------------------------------------------------------|-------------|---------|------|-------|----------|----|-------|------|------|------|------|--------|---------|--------|--------|
| 227 | Protein disulfide isomerase OS Homo sapiens GN P4HB PE 1 SV 3                                       | PDIA1_HUMAN | P07237  | 4.56 | 57516 | 20127.57 | 29 | 2.76  | -1.4 | -1.1 | -1.4 | 1.1  | -99.19 | -75.07  | -99.76 | 65.82  |
| 228 | Insulin like growth factor 2 mRNA binding protein 3 OS Homo sapiens GN IGF2BP3 PE 1 SV 2            | IF2B3_HUMAN | O00425  | 9.19 | 64047 | 1668.361 | 14 | 3.45  | -1.1 | 1.2  | -1.1 | 1    | -89.55 | 92.54   | -47.54 | 28.77  |
| 229 | Eukaryotic translation initiation factor 3 subunit D OS Homo sapiens GN EIF3D PE 1 SV 1             | EIF3D_HUMAN | Q 15371 | 5.68 | 64600 | 1294.586 | 7  | 10.4  | -1.2 | -1.1 | -3.3 | -1.5 | -47.18 | 99.52   | -99.16 | -84.47 |
| 230 | Desmin OS Homo sapiens GN DES PE 1 SV 3                                                             | DESM_HUMAN  | P17661  | 5.03 | 53593 | 5545.81  | 13 | 5.53  | 3.3  | 1.9  | 2.6  | 1.4  | 99.30  | 95.84   | 92.37  | 84.06  |
| 231 | cAMP dependent protein kinase type II alpha regulatory subunit OS Homo sapiens GN PRKAR2A PE 1 SV 2 | KAP2_HUMAN  | P13861  | 4.77 | 45861 | 1911.196 | 10 | 12.62 | 1.1  | 1.5  | -1.8 | -1.4 | 28.63  | 92.82   | -89.55 | -94.58 |
| 232 | Cofilin 1 OS Homo sapiens GN CFL1 PE 1 SV 3                                                         | COF1_HUMAN  | P23528  | 8.22 | 18731 | 66929.81 | 15 | 33.13 | -1.5 | -1.4 | -1.3 | -1.1 | -98.90 | -96.24  | -97.03 | -78.37 |
| 233 | Caveolin 1 OS Homo sapiens GN CAV1 PE 1 SV 4                                                        | CAV1_HUMAN  | Q03135  | 5.59 | 20643 | 3448.942 | 6  | 22.47 | 1.5  | 2.1  | 1.4  | 1.1  | 99.91  | 99.63   | 99.95  | 50.07  |
| 234 | Creatine kinase B type OS Homo sapiens GN CKB PE 1 SV 1                                             | KCRB_HUMAN  | P12277  | 5.22 | 42930 | 5774.735 | 7  | 7.35  | 1.1  | 8.6  | 1.6  | -    | 74.43  | 100.00  | 99.67  | -99.95 |
| 235 | Caldesmon OS Homo sapiens GN CALD1 PE 1 SV 3                                                        | CALD1_HUMAN | Q05682  | 5.44 | 93288 | 15523.95 | 23 | 4.29  | 1.2  | -1.1 | -1.6 | 1.3  | 88.84  | -92.16  | -99.47 | 99.54  |
| 236 | Galectin 1 OS Homo sapiens GN LGALS1 PE 1 SV 2                                                      | LEG1_HUMAN  | P09382  | 5.14 | 15058 | 46494.94 | 8  | 19.6  | -1.3 | -2.4 | -1.1 | 1.2  | -99.43 | -100.00 | -66.23 | 99.48  |
| 237 | Transgelin 3 OS Homo sapiens GN TAGLN3 PE 1 SV 2                                                    | TAGL3_HUMAN | Q9UI15  | 7.17 | 22644 | 9376.353 | 9  | 7.04  | 2    | 3.9  | 1.2  | 1.1  | 99.68  | 99.98   | 76.44  | 45.93  |
| 238 | Transgelin 2 OS Homo sapiens GN TAGLN2 PE 1 SV 3                                                    | TAGL2_HUMAN | P37802  | 8.45 | 22563 | 78708.73 | 21 | 14.57 | 1.2  | -1.2 | 1.2  | -1.7 | 96.64  | -88.83  | 93.69  | -99.79 |
| 239 | Prohibitin 2 OS Homo sapiens GN PHB PE 1 SV 2                                                       | PHB2_HUMAN  | Q99623  | 10.9 | 33296 | 2607.423 | 12 | 22.07 | 1.2  | 1.4  | 1.3  | -1.2 | 91.52  | 97.26   | 97.49  | -99.96 |
| 240 | Gelsolin OS Homo sapiens GN GSN PE 1 SV 1                                                           | GELS_HUMAN  | P06396  | 5.84 | 86097 | 16413.49 | 28 | 2.56  | -1.1 | 1.7  | 1.8  | 2.6  | -82.49 | 98.96   | 99.95  | 99.99  |

|     |                                                                         |             |        |      |       |          |    |       |      |      |      |      |        |         |        |        |
|-----|-------------------------------------------------------------------------|-------------|--------|------|-------|----------|----|-------|------|------|------|------|--------|---------|--------|--------|
| 241 | Thioredoxin OS Homo sapiens GN TXN PE 1 SV3                             | THIO_HUMAN  | P10599 | 4.62 | 12022 | 2920.735 | 2  | 17.4  | -1   | -2   | -1.4 | 1.4  | -3.76  | -100.00 | -99.92 | 17.68  |
| 242 | Proliferation associated protein 2G4 OS Homo sapiens GN PA2G4 PE 1 SV 3 | PA2G4_HUMAN | Q9uQ80 | 6.11 | 44129 | 4896.417 | 16 | 17.01 | -1.5 | -1.1 | -1.7 | -1.5 | -98.65 | -82.93  | -99.75 | -99.52 |
| 243 | Protein enabled homolog OS Homo sapiens Gn ENAH PE 1 SV 2               | ENAH_HUMAN  | Q8N8S7 | 6.54 | 66624 | 1701.19  | 6  | 3.21  | -1.1 | 1.4  | -1.4 | -1.2 | -47.18 | 99.52   | -99.16 | -84.47 |
| 244 | Reticulocalbin 3 OS Homo sapiens GN RCN3 PE 1 SV 1                      | RCN3_HUMAN  | Q96D15 | 4.56 | 37493 | 7251.084 | 15 | 7.32  | -2   | -1.4 | 1.9  | 1.2  | -97.47 | -97.98  | 99.97  | 98.48  |
| 245 | Tubulin beta 3 chain OS Homo sapiens GN TUBB3 PE 1 SV 2                 | TBB3_HUMAN  | Q13509 | 4.64 | 50889 | 51656.5  | 26 | 12.89 | -1.1 | -1   | 1.1  | 1.2  | -92.37 | -33.07  | 68.12  | 91.11  |
| 246 | Rho GDP dissociation inhibitor 1 OS Homo sapiens GN ARHGDI PE 1 SV 3    | GDIR1_HUMAN | P52565 | 4.82 | 23264 | 12686.05 | 8  | 7.35  | 1.1  | 1.1  | 1.6  | 1.2  | 26.31  | 52.76   | 96.91  | 84.68  |
| 247 | Protein S100 A4 OS Homo sapiens GN S100A4 PE 1 SV 1                     | S10A4_HUMAN | P26447 | 5.77 | 11957 | 11353.28 | 6  | 33.66 | 2.8  | -    | 12.9 | 2.2  | 99.09  | -62.61  | 99.98  | 99.96  |
| 248 | Protein S100 A6 OS Homo sapiens GN S100A6 PE 1 SV 1                     | S10A6_HUMAN | P06703 | 5.17 | 10237 | 25335.51 | 7  | 40    | 2.8  | 1    | 3.1  | 2.5  | 100.00 | 41.38   | 99.99  | 100.00 |
| 249 | Protein S100 A13 OS Homo sapiens GN S100A13 PE 1 SV 1                   | S10AD_HUMAN | Q99584 | 5.83 | 11471 | 8423.788 | 9  | 39.8  | -1.4 | -2.9 | 1.3  | 1.4  | -99.36 | -100.00 | 99.38  | 99.78  |
| 250 | Protein S100 A16 OS Homo sapiens GN S100A16 PE 1 SV 1                   | S10AG_HUMAN | Q96FQ6 | 6.35 | 11858 | 5796.079 | 5  | 52.43 | -1.2 | -1.8 | 1.6  | -1.1 | -83.46 | -99.90  | 99.89  | -35.32 |
